# Supplementary material for: A 3D molecular atlas of the chick embryonic heart
Source: bioRxiv or medRxiv preprint supplement (doi:10.1101/609032), 2019-04-15
Supplement: Supplementary file [file media-5.pdf]

| Region from RNAseq   | Transcript                                | Specific to OFT within heart? | Expressed outside of the heart?         | Novel marker to OFT? | Published expression in OFT                                                  | Published expression in heart outside of the OFT                                                                                                                                                                                                    |
|----------------------|-------------------------------------------|-------------------------------|-----------------------------------------|----------------------|------------------------------------------------------------------------------|-----------------------------------------------------------------------------------------------------------------------------------------------------------------------------------------------------------------------------------------------------|
| Outflow Tract (OFT)  | <i>ACTA2</i>                              | no                            | yes                                     | no                   | Expressed in 56 hours post fertilisation (hpf) zebrafish OFT <sup>1</sup>    | Expressed in inflow and outflow tract in Hamburger Hamilton <sup>2</sup> (HH) stage 15 chick embryos <sup>3</sup>                                                                                                                                   |
| OFT                  | <i>FGF8</i>                               | yes                           | yes                                     | yes                  |                                                                              | mRNA detected in embryonic day (E)8.5-9 mouse splanchnic mesoderm <sup>4</sup> . <i>fgf8/ace</i> is expressed throughout the zebrafish ventricle at 36hpf <sup>5</sup> . <i>FGF8</i> mRNA is not detected in the HH16 chick embryo OFT <sup>6</sup> |
| OFT                  | <i>GDF3/</i><br><i>cVg1</i>               | yes                           | yes                                     | yes                  |                                                                              | Expressed in prospective ventricle in HH13 chick <sup>7</sup>                                                                                                                                                                                       |
| OFT                  | <i>HPGDS</i>                              | yes                           | yes                                     | yes                  |                                                                              |                                                                                                                                                                                                                                                     |
| OFT                  | <i>CR385930</i><br><i>/ LBH-<br/>LIKE</i> | yes                           | yes                                     | yes                  |                                                                              |                                                                                                                                                                                                                                                     |
| OFT                  | <i>MSX2</i>                               | yes                           | yes                                     | no                   | Detected in E9.5 mouse OFT <sup>8</sup>                                      |                                                                                                                                                                                                                                                     |
| OFT                  | <i>OLFML2B</i>                            | no                            | yes                                     | no                   |                                                                              |                                                                                                                                                                                                                                                     |
| OFT                  | <i>PRSS23</i>                             | yes                           | yes                                     | yes                  |                                                                              | mRNA detected in the zebrafish atrium, ventricle and atrioventricular canal at 48hpf <sup>9</sup>                                                                                                                                                   |
| OFT                  | <i>RASSF5</i>                             | no                            | yes                                     | no                   |                                                                              |                                                                                                                                                                                                                                                     |
| OFT                  | <i>SPRY2</i>                              | no                            | yes                                     | no                   | Expressed in splanchnic mesoderm and OFT in E8.5 mouse embryos <sup>10</sup> |                                                                                                                                                                                                                                                     |
| OFT                  | <i>PKIG</i>                               | no                            | yes                                     | no                   |                                                                              |                                                                                                                                                                                                                                                     |
| Region from RNAseq   | Transcript                                | Specific to RV within heart?  | Expressed outside of the heart at HH12? | Novel marker to RV?  | Published expression in RV                                                   | Published expression in heart outside of the RV                                                                                                                                                                                                     |
| Right ventricle (RV) | <i>AMY2A</i>                              | no                            | yes                                     | no                   |                                                                              |                                                                                                                                                                                                                                                     |
| RV                   | <i>BMP10</i>                              | yes                           | no                                      | yes                  |                                                                              | Transcripts detected throughout the prospective ventricle at HH10, and in OFT, Vs, and embryonic atria in HH14 chick embryos <sup>11</sup> . Expressed in E9.0 mouse ventricle and bulbus cordis (OFT region) <sup>12</sup>                         |

|                           |                               |                                     |                                                |                            |                                                                                                                                                             |                                                                                                      |
|---------------------------|-------------------------------|-------------------------------------|------------------------------------------------|----------------------------|-------------------------------------------------------------------------------------------------------------------------------------------------------------|------------------------------------------------------------------------------------------------------|
| RV                        | <i>DRAXIN</i>                 | yes                                 | yes                                            | yes                        | Expressed in the rostral part of the prospective ventricle in HH15 chick heart <sup>13</sup>                                                                |                                                                                                      |
| RV                        | <i>FBXL22</i>                 | no                                  | yes                                            | no                         |                                                                                                                                                             |                                                                                                      |
| RV                        | <i>NPPA</i> /<br><i>NPPB</i>  | no                                  | no                                             | no                         | <i>NPPB</i> <sup>14</sup> expressed in prospective ventricle of E8.5 mouse and the rostral part of the HH12-13 chick prospective ventricle <sup>7, 15</sup> | Expressed throughout stage 32 <i>Xenopus</i> heart tube <sup>16</sup>                                |
| RV                        | <i>TGFBI</i>                  | yes                                 | yes                                            | yes                        |                                                                                                                                                             | mRNA is expressed in E10.0-10.5 mouse OFT and endocardial cushions of the AV canal <sup>17, 18</sup> |
| RV                        | <i>TIMP3</i>                  | no                                  | yes                                            | no                         |                                                                                                                                                             |                                                                                                      |
| <b>Region from RNAseq</b> | <b>Transcript</b>             | <b>Specific to LV within heart?</b> | <b>Expressed outside of the heart at HH12?</b> | <b>Novel marker to LV?</b> | <b>Published expression in LV</b>                                                                                                                           | <b>Published expression in heart outside of the LV</b>                                               |
| Left ventricle (LV)       | <i>ADCYAP1</i> / <i>PACAP</i> | no                                  | no                                             | no                         |                                                                                                                                                             |                                                                                                      |
| LV                        | <i>EMILIN2</i>                | yes                                 | no                                             | no                         | <i>emilin2b</i> is expressed in the zebrafish ventricle at 40hpf <sup>19</sup> . Expression is detected in the E10.5 mouse ventricle <sup>20</sup>          | <i>emilin2a</i> is expressed in the zebrafish atrium at 48hpf <sup>19</sup>                          |
| LV                        | <i>HS6ST3</i>                 | yes                                 | yes                                            | yes                        |                                                                                                                                                             |                                                                                                      |
| LV                        | <i>MB</i>                     | yes                                 | no                                             | no                         | Detected in E9.5 mouse ventricles <sup>21</sup> and 48hpf zebrafish heart <sup>22</sup> but regionalisation is not clear in either                          |                                                                                                      |
| LV                        | <i>MGAT3</i>                  | yes                                 | yes                                            | yes                        |                                                                                                                                                             |                                                                                                      |
| LV                        | <i>PLBD1</i>                  | no                                  | yes                                            | yes                        |                                                                                                                                                             |                                                                                                      |
| LV                        | <i>ZNF106</i>                 | no                                  | yes                                            | yes                        |                                                                                                                                                             |                                                                                                      |
| <b>Region from RNAseq</b> | <b>Transcript</b>             | <b>Specific to Vs within heart?</b> | <b>Expressed outside of the heart at HH12?</b> | <b>Novel marker to Vs?</b> | <b>Published expression in Vs</b>                                                                                                                           | <b>Published expression in heart outside of the Vs</b>                                               |
| Ventricles (Vs)           | <i>CMYA5</i>                  | no                                  | yes                                            | no                         |                                                                                                                                                             | Expressed in both the atria and ventricles of E10.5 mouse <sup>23</sup>                              |
| Vs                        | <i>EXFABP</i>                 | no                                  | yes                                            | no                         |                                                                                                                                                             |                                                                                                      |
| Vs                        | <i>IRX4</i>                   | yes                                 | no                                             | no                         | Expression is detected in prospective ventricles of HH9+ chick <sup>24</sup> and E8.5 mouse embryos <sup>25</sup>                                           |                                                                                                      |

|                           |                    |                                      |                                                |                            |                                                                                                                                                                                                                                                                                          |                                                                                                                                                                |
|---------------------------|--------------------|--------------------------------------|------------------------------------------------|----------------------------|------------------------------------------------------------------------------------------------------------------------------------------------------------------------------------------------------------------------------------------------------------------------------------------|----------------------------------------------------------------------------------------------------------------------------------------------------------------|
| Vs                        | <i>KCNH6/ERG</i>   | no                                   | yes                                            | no                         | Weak expression detected in HH11 quail heart <sup>26</sup> but regionalisation is not clear                                                                                                                                                                                              |                                                                                                                                                                |
| Vs                        | <i>LDB3</i>        | no                                   | no                                             | no                         |                                                                                                                                                                                                                                                                                          |                                                                                                                                                                |
| Vs                        | <i>LOX</i>         | no                                   | yes                                            | no                         | Expressed in E11.5 mouse ventricle <sup>27</sup>                                                                                                                                                                                                                                         |                                                                                                                                                                |
| Vs                        | <i>LYPD1</i>       | no                                   | yes                                            | no                         |                                                                                                                                                                                                                                                                                          |                                                                                                                                                                |
| Vs                        | <i>MYH15/VMHC1</i> | no                                   | no                                             | no                         | A <i>MYH15/VMHC1</i> specific mRNA in situ hybridisation probe is restricted to the prospective ventricle of HH12 chick embryos <sup>28</sup> . Zebrafish <i>vmhc</i> is detected in the 24-48hpf prospective ventricle <sup>29, 30</sup>                                                | mRNA in situ hybridisation probes that recognise both <i>MYH15/VMHC1</i> and <i>MYH7b</i> are detected throughout the HH12 chick heart <sup>28, 31, 32</sup> . |
| Vs                        | <i>MYL1/MLC3f</i>  | no                                   | yes                                            | no                         |                                                                                                                                                                                                                                                                                          | Expressed in both the ventricle and inflow region (atria and sinus venosus) at E8.5 in mouse embryos <sup>33</sup>                                             |
| Vs                        | <i>MYL3/MLC1V</i>  | no                                   | no                                             | no                         |                                                                                                                                                                                                                                                                                          | Expression is detected throughout the E8.0 mouse heart tube and in atria and ventricles at E9.5 <sup>34</sup>                                                  |
| Vs                        | <i>PLN</i>         | no                                   | no                                             | no                         | Expressed in HH15 chick ventricle <sup>35</sup> but regionalisation is not clear                                                                                                                                                                                                         |                                                                                                                                                                |
| Vs                        | <i>PLPPR1</i>      | no                                   | yes                                            | no                         |                                                                                                                                                                                                                                                                                          |                                                                                                                                                                |
| Vs                        | <i>SORBS2</i>      | no                                   | yes                                            | no                         |                                                                                                                                                                                                                                                                                          |                                                                                                                                                                |
| Vs                        | <i>SSPN</i>        | no                                   | yes                                            | no                         |                                                                                                                                                                                                                                                                                          |                                                                                                                                                                |
| Vs                        | <i>TNNI2</i>       | no                                   | yes                                            | no                         |                                                                                                                                                                                                                                                                                          |                                                                                                                                                                |
| Vs                        | <i>VCAM1</i>       | no                                   | yes                                            | no                         | Protein is detected in the prospective ventricle of E8.75 mouse embryos <sup>36</sup>                                                                                                                                                                                                    |                                                                                                                                                                |
| <b>Region from RNAseq</b> | <b>Transcript</b>  | <b>Specific to At. within heart?</b> | <b>Expressed outside of the heart at HH12?</b> | <b>Novel marker to At?</b> | <b>Published expression in At.</b>                                                                                                                                                                                                                                                       | <b>Published expression in heart outside of the At.</b>                                                                                                        |
| Atria (At)                | <i>ADM</i>         | no                                   | no                                             | no                         |                                                                                                                                                                                                                                                                                          | Protein is detected in both the atria and ventricles of E9 mouse embryos <sup>37</sup>                                                                         |
| At                        | <i>BORCS8</i>      | no                                   | yes                                            | no                         |                                                                                                                                                                                                                                                                                          |                                                                                                                                                                |
| At                        | <i>FAM3B</i>       | no                                   | yes                                            | no                         |                                                                                                                                                                                                                                                                                          |                                                                                                                                                                |
| At                        | <i>GJD2</i>        | no                                   | no                                             | no                         |                                                                                                                                                                                                                                                                                          |                                                                                                                                                                |
| At                        | <i>MYH7/AMHC1</i>  | yes                                  | no                                             | no                         | Expressed in prospective atria in HH14 chick embryos <sup>32</sup> . <i>MHCa/Myh6</i> in mouse is expressed in the caudal part of the E8.0 heart tube (atrioventricular junction) <sup>34</sup> . Zebrafish <i>amhc</i> is expressed in the prospective atrium at 24-48hpf <sup>29</sup> | By E9.5 in mouse embryos, <i>MHCa/Myh6</i> transcripts are also detected in the ventricle as well as the atrium <sup>34</sup>                                  |

|                           |                   |                                      |                                                |                            |                                                                                                                                                |                                                                                                                                                                                                                                                                          |
|---------------------------|-------------------|--------------------------------------|------------------------------------------------|----------------------------|------------------------------------------------------------------------------------------------------------------------------------------------|--------------------------------------------------------------------------------------------------------------------------------------------------------------------------------------------------------------------------------------------------------------------------|
| At                        | <i>RSPO3</i>      | yes                                  | yes                                            | no                         | <i>RSPO3</i> transcripts are detected in the caudal pole of the E8.5 mouse heart <sup>38</sup> , but it's localisation to the atria is unclear | By E9.5-E10.5 of mouse heart development expression is observed in the atrioventricular canal and OFT <sup>38</sup>                                                                                                                                                      |
| At                        | <i>SOD3</i>       | yes                                  | no                                             | yes                        |                                                                                                                                                |                                                                                                                                                                                                                                                                          |
| At                        | <i>STBD1</i>      | yes                                  | yes                                            | yes                        |                                                                                                                                                |                                                                                                                                                                                                                                                                          |
| At                        | <i>TUFT1</i>      | yes                                  | yes                                            | yes                        |                                                                                                                                                |                                                                                                                                                                                                                                                                          |
| At                        | <i>UGT1A1</i>     | no                                   | yes                                            | no                         |                                                                                                                                                |                                                                                                                                                                                                                                                                          |
| At                        | <i>VIM</i>        | yes                                  | yes                                            | no                         | Protein detected in HH12 chick myocardium, but regionalisation is unclear <sup>39</sup>                                                        | Protein detected in atrial myocardium but also OFT endocardium and epicardium in HH21 chick heart <sup>40</sup>                                                                                                                                                          |
| At                        | <i>WNT6</i>       | yes                                  | yes                                            | yes                        |                                                                                                                                                | Expressed in the atrioventricular junction in chick embryos at HH17 <sup>41</sup> . XWnt6 protein is detected in the endocardium at stage 32, and in atrial and ventricular myocardium, as well as the epicardium, in stage 38-42 <i>Xenopus</i> embryos <sup>42</sup> . |
| <b>Region from RNAseq</b> | <b>Transcript</b> | <b>Specific to En. within heart?</b> | <b>Expressed outside of the heart at HH12?</b> | <b>Novel marker to En?</b> | <b>Published expression in En.</b>                                                                                                             | <b>Published expression in heart outside of the En.</b>                                                                                                                                                                                                                  |
| Endo-cardium (En)         | <i>BHMT</i>       | yes                                  | yes                                            | yes                        |                                                                                                                                                |                                                                                                                                                                                                                                                                          |
| En                        | <i>EDN1</i>       | yes                                  | yes                                            | yes                        |                                                                                                                                                | <i>Edn1</i> expressed in OFT of E10.0 mouse heart <sup>43</sup>                                                                                                                                                                                                          |
| En                        | <i>FOXO1</i>      | no                                   | yes                                            | no                         |                                                                                                                                                | Protein is detected in the myocardium as well as the endocardium of E10.5 mouse embryos <sup>44</sup>                                                                                                                                                                    |
| En                        | <i>HEG1</i>       | no                                   | yes                                            | no                         | Expressed in E10.5 mouse endocardium <sup>45</sup>                                                                                             |                                                                                                                                                                                                                                                                          |
| En                        | <i>IQSEC1</i>     | no                                   | yes                                            | no                         |                                                                                                                                                |                                                                                                                                                                                                                                                                          |
| En                        | <i>KLF2</i>       | yes                                  | no                                             | no                         | Expression is detected in the endocardium of E8.5 mouse embryos <sup>46</sup>                                                                  |                                                                                                                                                                                                                                                                          |
| En                        | <i>NFATC1</i>     | yes                                  | yes                                            | no                         | Expressed in the endocardium of E8.5 mouse embryos <sup>47</sup>                                                                               | In addition to the endocardium, expression is detected in the vitelline vein (sinus venosus) region of E8.5 mouse embryos <sup>47</sup>                                                                                                                                  |
| En                        | <i>NPC2</i>       | yes                                  | no                                             | yes                        |                                                                                                                                                |                                                                                                                                                                                                                                                                          |
| En                        | <i>PLVAP</i>      | yes                                  | yes                                            | yes                        |                                                                                                                                                |                                                                                                                                                                                                                                                                          |
| En                        | <i>POSTN</i>      | no                                   | yes                                            | no                         | Expression starts to be detectable in the RV endocardium from HH17 in chick embryos <sup>48</sup>                                              | Expressed in E10.0-10.5 mouse embryo OFT and endocardial cushions of the AV canal <sup>17, 18</sup>                                                                                                                                                                      |
| En                        | <i>RARRES1</i>    | yes                                  | yes                                            | yes                        |                                                                                                                                                |                                                                                                                                                                                                                                                                          |
| En                        | <i>STAB1</i>      | yes                                  | yes                                            | no                         | Endocardial expression is detected in E10.0-5 mouse embryos <sup>17, 18</sup>                                                                  |                                                                                                                                                                                                                                                                          |

|                                   |                   |                         |                                                |                             |                                                                                                                                                                                      |                                                                                                                                                                                                                                                                                                                                                                                                                                                 |
|-----------------------------------|-------------------|-------------------------|------------------------------------------------|-----------------------------|--------------------------------------------------------------------------------------------------------------------------------------------------------------------------------------|-------------------------------------------------------------------------------------------------------------------------------------------------------------------------------------------------------------------------------------------------------------------------------------------------------------------------------------------------------------------------------------------------------------------------------------------------|
| En                                | <i>TAL1</i>       | no                      | yes                                            | no                          |                                                                                                                                                                                      | <i>TAL1</i> is detected in blood Islands and blood cells at HH10-11, and in endothelial cells of the aorta at ~HH18, but localisation in the heart is not clear <sup>49, 50</sup>                                                                                                                                                                                                                                                               |
| En                                | <i>TIE1</i>       | yes                     | yes                                            | no                          | Expressed in HH12 chick endothelial cells and endocardium <sup>51</sup> and the endocardium in 48hpf zebrafish embryos <sup>52</sup>                                                 |                                                                                                                                                                                                                                                                                                                                                                                                                                                 |
| <b>Region from RNAseq</b>         | <b>Transcript</b> | <b>Specific to RDM?</b> | <b>Expressed outside of the heart at HH12?</b> | <b>Novel marker to RDM?</b> | <b>Published expression in RDM</b>                                                                                                                                                   | <b>Published expression in heart outside of the RDM</b>                                                                                                                                                                                                                                                                                                                                                                                         |
| Rostral dorsal meso-cardium (RDM) | <i>ANXA1</i>      | yes                     | yes                                            | yes                         |                                                                                                                                                                                      |                                                                                                                                                                                                                                                                                                                                                                                                                                                 |
| RDM                               | <i>BMP4</i>       | no                      | yes                                            | no                          | <i>BMP4</i> expression is detected in the RDM in HH16 chick embryos <sup>6</sup> . <i>Bmp4</i> transcripts are present in the dorsal mesocardium of E9.5 mouse embryos <sup>53</sup> | In addition to the RDM, <i>BMP4</i> is detected in the caudal dorsal mesocardium and is continuous with the splanchnic mesoderm in HH16 chick embryos <sup>6</sup> . <i>XBmp4</i> transcripts are detected throughout the heart tube at stage 32 and in the dorsal presumptive atrium and ventricle at stage 35 <sup>54</sup> . In 24hpf zebrafish embryos, <i>bmp4</i> is expressed on the left side of the atrium and ventricle <sup>55</sup> |
| RDM                               | <i>CCDC3</i>      | no                      | yes                                            | no                          |                                                                                                                                                                                      |                                                                                                                                                                                                                                                                                                                                                                                                                                                 |
| RDM                               | <i>EBF3</i>       | no                      | yes                                            | no                          |                                                                                                                                                                                      |                                                                                                                                                                                                                                                                                                                                                                                                                                                 |
| RDM                               | <i>ISL1</i>       | no                      | yes                                            | no                          | Expression is detected in the RDM of HH13 chick embryos <sup>56</sup>                                                                                                                | Expression is detected in both RDM and CDM of HH13 chick embryos <sup>56</sup> . Expressed in the splanchnic mesoderm of E8.5 mouse embryos <sup>57</sup> .                                                                                                                                                                                                                                                                                     |
| RDM                               | <i>KAZALD1</i>    | no                      | yes                                            | no                          |                                                                                                                                                                                      |                                                                                                                                                                                                                                                                                                                                                                                                                                                 |
| RDM                               | <i>LOC417741</i>  | no                      | yes                                            | no                          |                                                                                                                                                                                      |                                                                                                                                                                                                                                                                                                                                                                                                                                                 |
| RDM                               | <i>LUM</i>        | no                      | yes                                            | no                          |                                                                                                                                                                                      |                                                                                                                                                                                                                                                                                                                                                                                                                                                 |
| RDM                               | <i>PKDCCB</i>     | no                      | yes                                            | no                          |                                                                                                                                                                                      |                                                                                                                                                                                                                                                                                                                                                                                                                                                 |
| RDM                               | <i>PROM1</i>      | no                      | yes                                            | no                          |                                                                                                                                                                                      |                                                                                                                                                                                                                                                                                                                                                                                                                                                 |
| RDM                               | <i>SIX1</i>       | no                      | yes                                            | no                          |                                                                                                                                                                                      | <i>Six1</i> transcripts are detected in the splanchnic mesoderm of E8.5 mouse embryos <sup>58</sup>                                                                                                                                                                                                                                                                                                                                             |
| RDM                               | <i>SLIT2</i>      | no                      | yes                                            | no                          |                                                                                                                                                                                      |                                                                                                                                                                                                                                                                                                                                                                                                                                                 |
| RDM                               | <i>TNC</i>        | yes                     | yes                                            | yes                         |                                                                                                                                                                                      | <i>Tnc</i> is observed in the E9.5 mouse proepicardium <sup>59</sup>                                                                                                                                                                                                                                                                                                                                                                            |

| Region from RNAseq               | Transcript       | Specific to CDM? | Expressed outside of the heart at HH12? | Novel marker to CDM? | Published expression in CDM | Published expression in heart outside of the CDM                                                                                         |
|----------------------------------|------------------|------------------|-----------------------------------------|----------------------|-----------------------------|------------------------------------------------------------------------------------------------------------------------------------------|
| Caudal dorsal meso-cardium (CDM) | <i>APCDD1</i>    | no               | yes                                     | no                   |                             |                                                                                                                                          |
| CDM                              | <i>FOXF2</i>     | no               | yes                                     | no                   |                             | mRNA detected in hindgut splanchnic mesoderm at E8.5, and foregut and hindgut splanchnic mesoderm at E9.5 in mouse embryos <sup>60</sup> |
| CDM                              | <i>HOXA1</i>     | no               | yes                                     | no                   |                             | <i>Hoxa1</i> transcripts are detected in the splanchnic mesoderm adjacent to the CDM in E8.5 mouse embryos <sup>61</sup>                 |
| CDM                              | <i>HOXA2</i>     | no               | yes                                     | no                   |                             |                                                                                                                                          |
| CDM                              | <i>LINGO1</i>    | no               | yes                                     | no                   |                             |                                                                                                                                          |
| CDM                              | <i>MYCN</i>      | no               | yes                                     | no                   |                             | Detected in the myocardium of E9.5 mouse embryos <sup>62</sup> and HH20 chick embryos <sup>63</sup>                                      |
| CDM                              | <i>NGFR</i>      | no               | yes                                     | no                   |                             |                                                                                                                                          |
| CDM                              | <i>PTCH2</i>     | no               | yes                                     | no                   |                             | Expressed in the splanchnic mesoderm and dorsal mesocardia of E8.5-9.5 mouse embryos <sup>64</sup>                                       |
| CDM                              | <i>SMOC2</i>     | no               | yes                                     | no                   |                             | Smoc2 protein is detected in E14.5 mouse atrial and ventricular myocardium <sup>65</sup>                                                 |
| CDM                              | <i>STRA6</i>     | no               | yes                                     | no                   |                             |                                                                                                                                          |
| Region from RNAseq               | Transcript       | Specific to DM?  | Expressed outside of the heart at HH12? | Novel marker to DM?  | Published expression in DM  | Published expression in heart outside of the DM                                                                                          |
| Dorsal meso-cardium (DM)         | <i>ER81/ETV1</i> | no               | yes                                     | no                   |                             |                                                                                                                                          |
| DM                               | <i>IRX1</i>      | no               | yes                                     | no                   |                             | <i>Ir1</i> mRNA expression first detected in E10.5-11.5 mouse ventricular septum <sup>66</sup>                                           |

|                           |                   |                         |                                                |                             |                                                                                                                                             |                                                                                                                                                                        |
|---------------------------|-------------------|-------------------------|------------------------------------------------|-----------------------------|---------------------------------------------------------------------------------------------------------------------------------------------|------------------------------------------------------------------------------------------------------------------------------------------------------------------------|
| DM                        | <i>IRX3</i>       | no                      | yes                                            | no                          |                                                                                                                                             | <i>Irx3</i> expression is first detected in E9.5 mouse ventricles <sup>66</sup>                                                                                        |
| DM                        | <i>LIX1</i>       | no                      | yes                                            | no                          |                                                                                                                                             |                                                                                                                                                                        |
| DM                        | <i>RDH10</i>      | no                      | yes                                            | no                          |                                                                                                                                             |                                                                                                                                                                        |
| DM                        | <i>SALL4</i>      | no                      | yes                                            | no                          |                                                                                                                                             |                                                                                                                                                                        |
| DM                        | <i>WNT5A</i>      | no                      | yes                                            | no                          |                                                                                                                                             | Detected in the ventricle of HH20 chick embryos <sup>67</sup> . <i>Wnt5a</i> transcripts are observed in the OFT and RV myocardium in E8.5 mouse embryos <sup>68</sup> |
| <b>Region from RNAseq</b> | <b>Transcript</b> | <b>Specific to PEs?</b> | <b>Expressed outside of the heart at HH12?</b> | <b>Novel marker to PE?</b>  | <b>Published expression in PEs</b>                                                                                                          | <b>Published expression in heart outside of the PEs</b>                                                                                                                |
| Proepi-cardium (PE)       | <i>FGFR2</i>      | yes                     | yes                                            | no                          | <i>FGFR2</i> mRNA is detected in the RPE of HH17-18 chicken embryos <sup>69</sup> (by this stage the LPE has degenerated <sup>69,70</sup> ) |                                                                                                                                                                        |
| PE                        | <i>FGFR3</i>      | yes                     | yes                                            | yes                         |                                                                                                                                             | <i>FGFR3</i> mRNA not detected in the RPE of HH17-18 chicken embryos <sup>69</sup>                                                                                     |
| PE                        | <i>GAL</i>        | yes                     | yes                                            | yes                         |                                                                                                                                             |                                                                                                                                                                        |
| PE                        | <i>HBAA</i>       | no                      | yes                                            | yes                         |                                                                                                                                             |                                                                                                                                                                        |
| PE                        | <i>HBM /HBAD</i>  | no                      | yes                                            | no                          |                                                                                                                                             |                                                                                                                                                                        |
| PE                        | <i>HBZ</i>        | no                      | yes                                            | no                          |                                                                                                                                             |                                                                                                                                                                        |
| PE                        | <i>MAB21L1</i>    | yes                     | yes                                            | yes                         |                                                                                                                                             | <i>MAB21L1</i> transcripts are not detected in mouse embryonic heart <sup>71</sup>                                                                                     |
| PE                        | <i>MSX1</i>       | yes                     | yes                                            | no                          | Transcripts are detected in the epicardium of HH23 chick embryos <sup>72</sup>                                                              | Expressed in endocardial cushions of the atrioventricular canal in HH15 chick embryos <sup>72</sup>                                                                    |
| PE                        | <i>WT1</i>        | yes                     | yes                                            | no                          |                                                                                                                                             | Found to be expressed only in RPE of HH13 chick embryos <sup>73</sup>                                                                                                  |
| <b>Region from RNAseq</b> | <b>Transcript</b> | <b>Specific to LPE?</b> | <b>Expressed outside of the heart at HH12?</b> | <b>Novel marker to LPE?</b> | <b>Published expression in LPE</b>                                                                                                          | <b>Published expression in heart outside of the LPE</b>                                                                                                                |
| Left                      | <i>ANXA2</i>      | no                      | yes                                            | no                          |                                                                                                                                             | Expression is detected in the endocardium of HH15 chick embryos <sup>74</sup> . mRNA is                                                                                |

|                            |                   |                         |                                                |                             |                                                                              |                                                                                                                                                                                                                                                                                                       |
|----------------------------|-------------------|-------------------------|------------------------------------------------|-----------------------------|------------------------------------------------------------------------------|-------------------------------------------------------------------------------------------------------------------------------------------------------------------------------------------------------------------------------------------------------------------------------------------------------|
| proepi-cardium (LPE)       |                   |                         |                                                |                             |                                                                              | detected in the proepicardium of HH19-20 chick embryos <sup>75</sup> (by this stage the LPE has degenerated <sup>69,70</sup> ).                                                                                                                                                                       |
| LPE                        | <i>APOC3</i>      | no                      | yes                                            | no                          |                                                                              |                                                                                                                                                                                                                                                                                                       |
| LPE                        | <i>HOXB4</i>      | no                      | yes                                            | no                          |                                                                              |                                                                                                                                                                                                                                                                                                       |
| LPE                        | <i>HOXB5</i>      | no                      | yes                                            | no                          |                                                                              |                                                                                                                                                                                                                                                                                                       |
| LPE                        | <i>LHX2</i>       | no                      | yes                                            | no                          |                                                                              | <i>LHX2</i> expression is detected in the caudal pole of the HH18-20 chick heart <sup>76</sup> , although localisation is unclear. <i>LHX2</i> localises to the E9.5 mouse PE <sup>77</sup> . Transcripts are not detected in <i>Xenopus</i> PE at stages 32-46 <sup>78</sup> .                       |
| LPE                        | <i>LMO2</i>       | no                      | yes                                            | no                          |                                                                              | <i>LMO2</i> is detected in blood Islands at HH10-11 endothelial cells of the aorta at ~HH18 <sup>49,50</sup> , but localisation in the heart is not clear                                                                                                                                             |
| LPE                        | <i>PAMR1</i>      | no                      | yes                                            | no                          |                                                                              |                                                                                                                                                                                                                                                                                                       |
| LPE                        | <i>RBP4A</i>      | no                      | no                                             | no                          |                                                                              |                                                                                                                                                                                                                                                                                                       |
| LPE                        | <i>SST</i>        | yes                     | yes                                            | yes                         |                                                                              |                                                                                                                                                                                                                                                                                                       |
| <b>Region from RNAseq</b>  | <b>Transcript</b> | <b>Specific to RPE?</b> | <b>Expressed outside of the heart at HH12?</b> | <b>Novel marker to RPE?</b> | <b>Published expression in RPE</b>                                           | <b>Published expression in heart outside of the RPE</b>                                                                                                                                                                                                                                               |
| Right proepi-cardium (RPE) | <i>AGPAT2</i>     | no                      | yes                                            | no                          |                                                                              |                                                                                                                                                                                                                                                                                                       |
| RPE                        | <i>GEM</i>        | no                      | yes                                            | no                          |                                                                              |                                                                                                                                                                                                                                                                                                       |
| RPE                        | <i>LSP1</i>       | no                      | yes                                            | no                          | mRNA is detected in the proepicardium of HH19-20 chick embryos <sup>75</sup> | Expression is detected in cardiac fibroblasts in E14.5 mouse embryos <sup>79</sup>                                                                                                                                                                                                                    |
| RPE                        | <i>OPRM1</i>      | no                      | yes                                            | no                          |                                                                              |                                                                                                                                                                                                                                                                                                       |
| RPE                        | <i>TBX18</i>      | no                      | yes                                            | no                          | <i>TBX18</i> is detected in the RPE of HH11-13 chick embryos <sup>73</sup>   | Transcripts are detected in both the right and the left PE in HH11-12 chick embryos <sup>80</sup> and in E8.5 mouse embryos <sup>70</sup> . In another study, <i>TBX18</i> is not only detected in the RPE but also throughout the prospective atrial region in HH11-13 chick embryos <sup>73</sup> . |
| RPE                        | <i>TENM4</i>      | yes                     | yes                                            | yes                         |                                                                              | mRNA expression in E8.5 mouse embryos is detected in the head folds, posterior somites and presomitic mesoderm <sup>81</sup>                                                                                                                                                                          |



| Region from RNAseq     | Transcript     | Specific to LPC?      | Expressed outside of the heart at HH12? | Novel marker to LPC?         | Published expression in LPC      | Published expression in heart outside of the LPC                                                                                                                                                                                                                                             |
|------------------------|----------------|-----------------------|-----------------------------------------|------------------------------|----------------------------------|----------------------------------------------------------------------------------------------------------------------------------------------------------------------------------------------------------------------------------------------------------------------------------------------|
| Left pace-maker (LPC)  | <i>ADAMTS3</i> | yes?                  | yes                                     | yes                          |                                  |                                                                                                                                                                                                                                                                                              |
| LPC                    | <i>GUCA2A</i>  | no                    | yes                                     | no                           |                                  |                                                                                                                                                                                                                                                                                              |
| LPC                    | <i>TTR</i>     | yes?                  | yes                                     | yes                          |                                  | Detected in endoderm of the anterior intestinal portal in HH8-14 chick embryos <sup>82, 83</sup> and in the myocardium of HH14 chick embryos <sup>83</sup> , although regionalisation is unclear.                                                                                            |
| Region from RNAseq     | Transcript     | Specific to RPC?      | Expressed outside of the heart at HH12? | Novel marker to RPC at HH12? | Published expression in RPC      | Published expression in heart outside of the RPC                                                                                                                                                                                                                                             |
| Right pace-maker (RPC) | <i>CENPW</i>   | no                    | yes                                     | no                           |                                  |                                                                                                                                                                                                                                                                                              |
| RPC                    | <i>PVALB</i>   | yes                   | no                                      | yes                          |                                  |                                                                                                                                                                                                                                                                                              |
| RPC                    | <i>SHOX2</i>   | yes                   | no                                      | yes                          |                                  | Initially expressed in the E8.5 mouse sinus venosus eventually restricting to the right dorsal atria (SAN region) <sup>84</sup> . Detected in the sinus venosus region of HH19 chick embryos <sup>85</sup> . <i>shox2</i> is detected in the 48hpf zebrafish sinoatrial region <sup>86</sup> |
| Region from RNAseq     | Transcript     | Specific to Left-RPC? | Expressed outside of the heart at HH12? | Novel marker to Left-RPC?    | Published expression in Left-RPC | Published expression in heart outside of the Left-RPC                                                                                                                                                                                                                                        |
| Left-RPC               | <i>JAG1</i>    | no                    | yes                                     | no                           |                                  | <i>Jag1</i> expression is detected in the E10.5 mouse pharyngeal endoderm and mesenchyme, OFT <sup>87</sup> , atria and RV <sup>88</sup>                                                                                                                                                     |
| Left-RPC               | <i>RAI14</i>   | no                    | yes                                     | no                           |                                  |                                                                                                                                                                                                                                                                                              |

| Region from RNAseq | Transcript  | Specific to PCs? | Expressed outside of the heart at HH12? | Novel marker to PCs? | Published expression in PC | Published expression in heart outside of the PC |
|--------------------|-------------|------------------|-----------------------------------------|----------------------|----------------------------|-------------------------------------------------|
| Pace-makers (PCs)  | <i>FGB</i>  | no               | yes                                     | no                   |                            |                                                 |
| Region from RNAseq | Transcript  | Specific to SV?  | Expressed outside of the heart at HH12? | Novel marker to SV?  | Published expression in SV | Published expression in heart outside of the SV |
| Sinus venosus (SV) | <i>MSI2</i> | no               | yes                                     | no                   |                            |                                                 |
| SV                 | <i>TNR</i>  | no               | yes                                     | no                   |                            |                                                 |

- Whitesell TR, Kennedy RM, Carter AD, Rollins EL, Georgijevic S, Santoro MM, Childs SJ. An alpha-smooth muscle actin (*acta2/alphasma*) zebrafish transgenic line marking vascular mural cells and visceral smooth muscle cells. *PLoS One*. 2014;9:e90590
- Hamburger V, Hamilton HL. A series of normal stages in the development of the chick embryo. *J Morphol*. 1951;88:49-92
- Colas JF, Lawson A, Schoenwolf GC. Evidence that translation of smooth muscle alpha-actin mrna is delayed in the chick promyocardium until fusion of the bilateral heart-forming regions. *Dev Dyn*. 2000;218:316-330
- Crossley PH, Martin GR. The mouse *fgf8* gene encodes a family of polypeptides and is expressed in regions that direct outgrowth and patterning in the developing embryo. *Development*. 1995;121:439-451
- Reifers F, Walsh EC, Leger S, Stainier DY, Brand M. Induction and differentiation of the zebrafish heart requires fibroblast growth factor 8 (*fgf8/acerebellar*). *Development*. 2000;127:225-235
- Tirosh-Finkel L, Elhanany H, Rinon A, Tzahor E. Mesoderm progenitor cells of common origin contribute to the head musculature and the cardiac outflow tract. *Development*. 2006;133:1943-1953

7. Somi S, Houweling AC, Buffing AA, Moorman AF, Van Den Hoff MJ. Expression of *cvg1* mRNA during chicken embryonic development. *Anat Rec A Discov Mol Cell Evol Biol*. 2003;273:603-608
8. Chen YH, Ishii M, Sun J, Sucov HM, Maxson RE, Jr. *Msx1* and *msx2* regulate survival of secondary heart field precursors and post-migratory proliferation of cardiac neural crest in the outflow tract. *Dev Biol*. 2007;308:421-437
9. Chen IH, Wang HH, Hsieh YS, Huang WC, Yeh HI, Chuang YJ. *Prss23* is essential for the snail-dependent endothelial-to-mesenchymal transition during valvulogenesis in zebrafish. *Cardiovasc Res*. 2013;97:443-453
10. Park EJ, Ogden LA, Talbot A, Evans S, Cai CL, Black BL, Frank DU, Moon AM. Required, tissue-specific roles for *fgf8* in outflow tract formation and remodeling. *Development*. 2006;133:2419-2433
11. Somi S, Buffing AA, Moorman AF, Van Den Hoff MJ. Expression of bone morphogenetic protein-10 mRNA during chicken heart development. *Anat Rec A Discov Mol Cell Evol Biol*. 2004;279:579-582
12. Neuhaus H, Rosen V, Thies RS. Heart specific expression of mouse *bmp-10* a novel member of the *tgf-beta* superfamily. *Mech Dev*. 1999;80:181-184
13. Islam SM, Shinmyo Y, Okafuji T, Su Y, Naser IB, Ahmed G, Zhang S, Chen S, Ohta K, Kiyonari H, Abe T, Tanaka S, Nishinakamura R, Terashima T, Kitamura T, Tanaka H. *Draxin*, a repulsive guidance protein for spinal cord and forebrain commissures. *Science*. 2009;323:388-393
14. Houweling AC, Somi S, Massink MP, Groenen MA, Moorman AF, Christoffels VM. Comparative analysis of the natriuretic peptide precursor gene cluster in vertebrates reveals loss of *anf* and retention of *cnp-3* in chicken. *Dev Dyn*. 2005;233:1076-1082
15. Houweling AC, Somi S, Van Den Hoff MJ, Moorman AF, Christoffels VM. Developmental pattern of *anf* gene expression reveals a strict localization of cardiac chamber formation in chicken. *Anat Rec*. 2002;266:93-102
16. Small EM, Krieg PA. Expression of atrial natriuretic factor (*anf*) during *Xenopus* cardiac development. *Dev Genes Evol*. 2000;210:638-640
17. Conway SJ, Molkentin JD. Periostin as a heterofunctional regulator of cardiac development and disease. *Curr Genomics*. 2008;9:548-555
18. Lindsley A, Li W, Wang J, Maeda N, Rogers R, Conway SJ. Comparison of the four mouse fasciclin-containing genes expression patterns during valvuloseptal morphogenesis. *Gene Expr Patterns*. 2005;5:593-600
19. Milanetto M, Tiso N, Braghetta P, Volpin D, Argenton F, Bonaldo P. Emilin genes are duplicated and dynamically expressed during zebrafish embryonic development. *Dev Dyn*. 2008;237:222-232
20. Braghetta P, Ferrari A, De Gemmis P, Zanetti M, Volpin D, Bonaldo P, Bressan GM. Overlapping, complementary and site-specific expression pattern of genes of the emilin/multimerin family. *Matrix Biol*. 2004;22:549-556

21. Mammen PP, Shelton JM, Ye Q, Kanatous SB, McGrath AJ, Richardson JA, Garry DJ. Cytoglobin is a stress-responsive hemoprotein expressed in the developing and adult brain. *J Histochem Cytochem.* 2006;54:1349-1361
22. Vlecken DH, Testerink J, Ott EB, Sakalis PA, Jaspers RT, Bagowski CP. A critical role for myoglobin in zebrafish development. *Int J Dev Biol.* 2009;53:517-524
23. Durham JT, Brand OM, Arnold M, Reynolds JG, Muthukumar L, Weiler H, Richardson JA, Naya FJ. Myospryn is a direct transcriptional target for mef2a that encodes a striated muscle, alpha-actinin-interacting, costamere-localized protein. *J Biol Chem.* 2006;281:6841-6849
24. Bao ZZ, Bruneau BG, Seidman JG, Seidman CE, Cepko CL. Regulation of chamber-specific gene expression in the developing heart by irx4. *Science.* 1999;283:1161-1164
25. Bruneau BG, Bao ZZ, Tanaka M, Schott JJ, Izumo S, Cepko CL, Seidman JG, Seidman CE. Cardiac expression of the ventricle-specific homeobox gene irx4 is modulated by nkx2-5 and dhand. *Dev Biol.* 2000;217:266-277
26. Crociani O, Cherubini A, Piccini E, Polvani S, Costa L, Fontana L, Hofmann G, Rosati B, Wanke E, Olivotto M, Arcangeli A. Erg gene(s) expression during development of the nervous and muscular system of quail embryos. *Mech Dev.* 2000;95:239-243
27. Tsuda T, Pan TC, Evangelisti L, Chu ML. Prominent expression of lysyl oxidase during mouse embryonic cardiovascular development. *Anat Rec A Discov Mol Cell Evol Biol.* 2003;270:93-96
28. Anderson C, Khan MA, Wong F, Solovieva T, Oliveira NM, Baldock RA, Tickle C, Burt DW, Stern CD. A strategy to discover new organizers identifies a putative heart organizer. *Nat Commun.* 2016;7:12656
29. Berdugo E, Coleman H, Lee DH, Stainier DY, Yelon D. Mutation of weak atrium/atrial myosin heavy chain disrupts atrial function and influences ventricular morphogenesis in zebrafish. *Development.* 2003;130:6121-6129
30. Yelon D, Horne SA, Stainier DY. Restricted expression of cardiac myosin genes reveals regulated aspects of heart tube assembly in zebrafish. *Dev Biol.* 1999;214:23-37
31. Bisaha JG, Bader D. Identification and characterization of a ventricular-specific avian myosin heavy chain, vmhc1: Expression in differentiating cardiac and skeletal muscle. *Dev Biol.* 1991;148:355-364
32. Yutzey KE, Rhee JT, Bader D. Expression of the atrial-specific myosin heavy chain amhc1 and the establishment of anteroposterior polarity in the developing chicken heart. *Development.* 1994;120:871-883
33. Kelly RG, Zammit PS, Mouly V, Butler-Browne G, Buckingham ME. Dynamic left/right regionalisation of endogenous myosin light chain 3f transcripts in the developing mouse heart. *J Mol Cell Cardiol.* 1998;30:1067-1081
34. Lyons GE, Schiaffino S, Sassoon D, Barton P, Buckingham M. Developmental regulation of myosin gene expression in mouse cardiac muscle. *J Cell Biol.* 1990;111:2427-2436

35. Wang DZ, Hu X, Lin JL, Kitten GT, Solursh M, Lin JJ. Differential displaying of mRNAs from the atrioventricular region of developing chicken hearts at stages 15 and 21. *Front Biosci.* 1996;1:a1-15
36. Kwee L, Baldwin HS, Shen HM, Stewart CL, Buck C, Buck CA, Labow MA. Defective development of the embryonic and extraembryonic circulatory systems in vascular cell adhesion molecule (vcam-1) deficient mice. *Development.* 1995;121:489-503
37. Montuenga LM, Martinez A, Miller MJ, Unsworth EJ, Cuttitta F. Expression of adrenomedullin and its receptor during embryogenesis suggests autocrine or paracrine modes of action. *Endocrinology.* 1997;138:440-451
38. Cambier L, Plate M, Sucov HM, Pashmforoush M. Nkx2-5 regulates cardiac growth through modulation of wnt signaling by responding to 3. *Development.* 2014;141:2959-2971
39. Page M. Changing patterns of cytokeratins and vimentin in the early chick embryo. *Development.* 1989;105:97-107
40. Perez-Pomares JM, Phelps A, Sedmerova M, Wessels A. Epicardial-like cells on the distal arterial end of the cardiac outflow tract do not derive from the proepicardium but are derivatives of the cephalic pericardium. *Dev Dyn.* 2003;227:56-68
41. Schubert FR, Mootosamy RC, Walters EH, Graham A, Tumiotto L, Munsterberg AE, Lumsden A, Dietrich S. Wnt6 marks sites of epithelial transformations in the chick embryo. *Mech Dev.* 2002;114:143-148
42. Lavery DL, Martin J, Turnbull YD, Hoppler S. Wnt6 signaling regulates heart muscle development during organogenesis. *Dev Biol.* 2008;323:177-188
43. Kurihara Y, Kurihara H, Maemura K, Kuwaki T, Kumada M, Yazaki Y. Impaired development of the thyroid and thymus in endothelin-1 knockout mice. *J Cardiovasc Pharmacol.* 1995;26 Suppl 3:S13-16
44. Sengupta A, Chakraborty S, Paik J, Yutzey KE, Evans-Anderson HJ. Foxo1 is required in endothelial but not myocardial cell lineages during cardiovascular development. *Dev Dyn.* 2012;241:803-813
45. Kleaveland B, Zheng X, Liu JJ, Blum Y, Tung JJ, Zou Z, Sweeney SM, Chen M, Guo L, Lu MM, Zhou D, Kitajewski J, Affolter M, Ginsberg MH, Kahn ML. Regulation of cardiovascular development and integrity by the heart of glass-cerebral cavernous malformation protein pathway. *Nat Med.* 2009;15:169-176
46. Lee JS, Yu Q, Shin JT, Sebzda E, Bertozzi C, Chen M, Mericko P, Stadtfeld M, Zhou D, Cheng L, Graf T, MacRae CA, Lepore JJ, Lo CW, Kahn ML. Klf2 is an essential regulator of vascular hemodynamic forces in vivo. *Dev Cell.* 2006;11:845-857
47. de la Pompa JL, Timmerman LA, Takimoto H, Yoshida H, Elia AJ, Samper E, Potter J, Wakeham A, Marengere L, Langille BL, Crabtree GR, Mak TW. Role of the nf- $\kappa$ c transcription factor in morphogenesis of cardiac valves and septum. *Nature.* 1998;392:182-186

48. Norris RA, Kern CB, Wessels A, Morales EI, Markwald RR, Mjaatvedt CH. Identification and detection of the periostin gene in cardiac development. *Anat Rec A Discov Mol Cell Evol Biol.* 2004;281:1227-1233
49. Jaffredo T, Bollerot K, Sugiyama D, Gautier R, Drevon C. Tracing the hemangioblast during embryogenesis: Developmental relationships between endothelial and hematopoietic cells. *Int J Dev Biol.* 2005;49:269-277
50. Minko K, Bollerot K, Drevon C, Hallais MF, Jaffredo T. From mesoderm to blood islands: Patterns of key molecules during yolk sac erythropoiesis. *Gene Expr Patterns.* 2003;3:261-272
51. Sato Y, Poynter G, Huss D, Filla MB, Czirok A, Rongish BJ, Little CD, Fraser SE, Lansford R. Dynamic analysis of vascular morphogenesis using transgenic quail embryos. *PLoS One.* 2010;5:e12674
52. Wang X, Yu Q, Wu Q, Bu Y, Chang NN, Yan S, Zhou XH, Zhu X, Xiong JW. Genetic interaction between pku300 and fbn2b controls endocardial cell proliferation and valve development in zebrafish. *J Cell Sci.* 2013;126:1381-1391
53. Briggs LE, Phelps AL, Brown E, Kakarla J, Anderson RH, van den Hoff MJ, Wessels A. Expression of the bmp receptor alk3 in the second heart field is essential for development of the dorsal mesenchymal protrusion and atrioventricular septation. *Circ Res.* 2013;112:1420-1432
54. Breckenridge RA, Mohun TJ, Amaya E. A role for bmp signalling in heart looping morphogenesis in xenopus. *Dev Biol.* 2001;232:191-203
55. Chen JN, van Eeden FJ, Warren KS, Chin A, Nusslein-Volhard C, Haffter P, Fishman MC. Left-right pattern of cardiac bmp4 may drive asymmetry of the heart in zebrafish. *Development.* 1997;124:4373-4382
56. Yuan S, Schoenwolf GC. Islet-1 marks the early heart rudiments and is asymmetrically expressed during early rotation of the foregut in the chick embryo. *Anat Rec.* 2000;260:204-207
57. Cai CL, Liang X, Shi Y, Chu PH, Pfaff SL, Chen J, Evans S. Isl1 identifies a cardiac progenitor population that proliferates prior to differentiation and contributes a majority of cells to the heart. *Dev Cell.* 2003;5:877-889
58. Guo C, Sun Y, Zhou B, Adam RM, Li X, Pu WT, Morrow BE, Moon A, Li X. A tbx1-six1/eya1-fgf8 genetic pathway controls mammalian cardiovascular and craniofacial morphogenesis. *J Clin Invest.* 2011;121:1585-1595
59. Imanaka-Yoshida K, Hara M, Namikata M, Miyamoto K, Hanato T, Watanabe N, Nakagawa M, Yoshida T. Possible roles of the extracellular matrix in coronary vasculogenesis of mouse. In: Artman M, Benson DW, Srivastava D, Nakazawa M, eds. *Cardiovascular development and congenital malformations: Molecular & genetic mechanisms.* Blackwell Publishing; 2005:112-115.
60. Ormestad M, Astorga J, Carlsson P. Differences in the embryonic expression patterns of mouse foxf1 and -2 match their distinct mutant phenotypes. *Dev Dyn.* 2004;229:328-333

61. Bertrand N, Roux M, Ryckebusch L, Niederreither K, Dolle P, Moon A, Capecchi M, Zaffran S. Hox genes define distinct progenitor sub-domains within the second heart field. *Dev Biol.* 2011;353:266-274
62. Kato K, Kanamori A, Wakamatsu Y, Sawai S, Kondoh H. Tissue distribution of n - myc expression in the early organogenesis period of the mouse embryo. *Development, Growth & Differentiation.* 1991;33:29-39
63. Sawai S, Kato K, Wakamatsu Y, Kondoh H. Organization and expression of the chicken n-myc gene. *Mol Cell Biol.* 1990;10:2017-2026
64. Rankin SA, Han L, McCracken KW, Kenny AP, Anglin CT, Grigg EA, Crawford CM, Wells JM, Shannon JM, Zorn AM. A retinoic acid-hedgehog cascade coordinates mesoderm-inducing signals and endoderm competence during lung specification. *Cell Rep.* 2016;16:66-78
65. Maier S, Paulsson M, Hartmann U. The widely expressed extracellular matrix protein smoc-2 promotes keratinocyte attachment and migration. *Exp Cell Res.* 2008;314:2477-2487
66. Christoffels VM, Keijser AG, Houweling AC, Clout DE, Moorman AF. Patterning the embryonic heart: Identification of five mouse iroquois homeobox genes in the developing heart. *Dev Biol.* 2000;224:263-274
67. Dealy CN, Roth A, Ferrari D, Brown AM, Kosher RA. Wnt-5a and wnt-7a are expressed in the developing chick limb bud in a manner suggesting roles in pattern formation along the proximodistal and dorsoventral axes. *Mech Dev.* 1993;43:175-186
68. Cohen ED, Miller MF, Wang Z, Moon RT, Morrisey EE. Wnt5a and wnt11 are essential for second heart field progenitor development. *Development.* 2012;139:1931-1940
69. Torlopp A, Schlueter J, Brand T. Role of fibroblast growth factor signaling during proepicardium formation in the chick embryo. *Dev Dyn.* 2010;239:2393-2403
70. Schulte I, Schlueter J, Abu-Issa R, Brand T, Manner J. Morphological and molecular left-right asymmetries in the development of the proepicardium: A comparative analysis on mouse and chick embryos. *Dev Dyn.* 2007;236:684-695
71. Saito Y, Kojima T, Takahashi N. Mab2112 is essential for embryonic heart and liver development. *PLoS One.* 2012;7:e32991
72. Chan-Thomas PS, Thompson RP, Robert B, Yacoub MH, Barton PJ. Expression of homeobox genes msx-1 (hox-7) and msx-2 (hox-8) during cardiac development in the chick. *Dev Dyn.* 1993;197:203-216
73. Schlueter J, Manner J, Brand T. Bmp is an important regulator of proepicardial identity in the chick embryo. *Dev Biol.* 2006;295:546-558
74. Krishnan S, Deora AB, Annes JP, Osoria J, Rifkin DB, Hajjar KA. Annexin ii-mediated plasmin generation activates tgf-beta3 during epithelial-mesenchymal transformation in the developing avian heart. *Dev Biol.* 2004;265:140-154

75. Bressan M, Henley T, Louie JD, Liu G, Christodoulou D, Bai X, Taylor J, Seidman CE, Seidman JG, Mikawa T. Dynamic cellular integration drives functional assembly of the heart's pacemaker complex. *Cell Rep.* 2018;23:2283-2291
76. Nohno T, Kawakami Y, Wada N, Ishikawa T, Ohuchi H, Noji S. Differential expression of the two closely related lim-class homeobox genes lh-2a and lh-2b during limb development. *Biochem Biophys Res Commun.* 1997;238:506-511
77. Smagulova FO, Manuylov NL, Leach LL, Tevosian SG. Gata4/fog2 transcriptional complex regulates lhx9 gene expression in murine heart development. *BMC Dev Biol.* 2008;8:67
78. Tandon P, Wilczewski CM, Williams CE, Conlon FL. The lhx9-integrin pathway is essential for positioning of the proepicardial organ. *Development.* 2016;143:831-840
79. Dupays L, Shang C, Wilson R, Kotecha S, Wood S, Towers N, Mohun T. Sequential binding of meis1 and nkx2-5 on the popdc2 gene: A mechanism for spatiotemporal regulation of enhancers during cardiogenesis. *Cell Rep.* 2015;13:183-195
80. Haenig B, Kispert A. Analysis of tbx18 expression in chick embryos. *Dev Genes Evol.* 2004;214:407-411
81. Lossie AC, Nakamura H, Thomas SE, Justice MJ. Mutation of I7rn3 shows that odz4 is required for mouse gastrulation. *Genetics.* 2005;169:285-299
82. Yanai M, Tatsumi N, Endo F, Yokouchi Y. Analysis of gene expression patterns in the developing chick liver. *Dev Dyn.* 2005;233:1116-1122
83. Barron M, McAllister D, Smith SM, Lough J. Expression of retinol binding protein and transthyretin during early embryogenesis. *Dev Dyn.* 1998;212:413-422
84. Espinoza-Lewis RA, Yu L, He F, Liu H, Tang R, Shi J, Sun X, Martin JF, Wang D, Yang J, Chen Y. Shox2 is essential for the differentiation of cardiac pacemaker cells by repressing nkx2-5. *Dev Biol.* 2009;327:376-385
85. Tiecke E, Bangs F, Blaschke R, Farrell ER, Rappold G, Tickle C. Expression of the short stature homeobox gene shox is restricted by proximal and distal signals in chick limb buds and affects the length of skeletal elements. *Dev Biol.* 2006;298:585-596
86. Burkhard SB, Bakkens J. Spatially resolved rna-sequencing of the embryonic heart identifies a role for wnt/beta-catenin signaling in autonomic control of heart rate. *Elife.* 2018;7
87. High FA, Jain R, Stoller JZ, Antonucci NB, Lu MM, Loomes KM, Kaestner KH, Pear WS, Epstein JA. Murine jagged1/notch signaling in the second heart field orchestrates fgf8 expression and tissue-tissue interactions during outflow tract development. *J Clin Invest.* 2009;119:1986-1996
88. Watanabe Y, Kokubo H, Miyagawa-Tomita S, Endo M, Igarashi K, Aisaki K, Kanno J, Saga Y. Activation of notch1 signaling in cardiogenic mesoderm induces abnormal heart morphogenesis in mouse. *Development.* 2006;133:1625-1634
